# Supplementary material
Source: Research Square preprint supplement (doi:10.21203/rs.3.rs-9420352/v1)
Supplement: Supplementary file 1 [file 971bbc781742837c9c4789cb.docx]

Suppl Table 1. Characteristics of laboratory parameters.

|  | Group with 25(OH)D3 > 20 ng/ml  (n=21) | Group with 25(OH)D3 ≤ 20  ng/ml  (n=32) | Statistics (H/χ2/t) | P value |
| --- | --- | --- | --- | --- |
| WBC, 109/L, mean ± SD | 7.24 ± 2.09 | 8.67 ± 2.92 | 1.941 | 0.058 |
| HCT, L/L, mean ± SD | 0.37 ± 0.05 | 0.33 ± 0.04 | 3.147 | **0.003** |
| HB, g/L, (IQR) | 124.0(104.5,134.5) | 102.5 (95.0, 121.0) | 6.259 | **0.012** |
| PLT, 109/L, mean ± SD | 412.57 ± 140.68 | 451.0 ± 144.21 | 0.958 | 0.343 |
| CRP, mg/L, (IQR) | 12.0 (1.4, 42.8) | 33.4 (8.1, 76.6) | 3.341 | 0.068 |
| ESR, mm/h, (IQR) | 35.0 (15.5, 81.5) | 66.0 (32.3, 89.5) | 2.744 | 0.098 |
| Fecal calprotectin, (+), n (%) | 18 (85.7) | 32 (100.0) | 4.846 | **0.028** |
| Albumin, g/L, mean ± SD | 40.14 ± 4.76 | 35.63 ± 4.72 | 3.395 | **0.001** |
| Calcium,mmol/L, mean ± SD | 2.31 ± 0.12 | 2.23 ± 0.12 | 2.430 | **0.019** |
| Phosphorus,mmol/L, mean ± SD | 1.63 ± 0.25 | 1.63 ± 0.30 | 0.043 | 0.966 |
| ALP, U/L, mean ± SD | 175.1 ± 88.94 | 136.97 ± 81.14 | 1.609 | 0.114 |
| BA-CA, years, mean ± SD | 0.82 ± 0.85 | -0.15 ± 1.09 | 3.457 | **0.001** |
| Bone Age Delay ,Yes, n (%) | 0 (0.0) | 7 (21.9) | 5.293 | **0.034** |

WBC, white blood cell count; HCT,hematocrit; HB, hemoglobin; PLT, platelet counts; CRP, C-reactive protein; ESR, erythrocyte sedimentation rate; ALP, Alkaline phosphatase; BA,Bone Age; CA,Chronological Age

Suppl Table 2. Correlations between 25(OH)D3 and several parameters in Pediatric Crohn’s Disease

| Specific Indicator | rS | P |
| --- | --- | --- |
| PCDAI | -0.47 | ＜0.001 |
| SES-CD | -0.39 | 0.004 |
| ESR | -0.27 | 0.050 |
| ALB | 0.44 | 0.001 |
| HCT | 0.53 | ＜0.001 |
| Hb | 0.48 | 0.001 |
| PLT | -0.29 | 0.038 |
| BA-CA | 0.48 | ＜0.001 |
| Ca | 0.41 | 0.002 |

rs, correlation coefficient for Spearman correlation; ALB, albumin;PLT,blood platelet count;

BA-CA, bone mineral density-related index; Ca, calcium.

Suppl Table 3. Receiver-operating characteristic analysis for active pediatric Crohn's disease.

| Predictor | AUC | 95% CI | P |
| --- | --- | --- | --- |
| 25(OH)D3 | 0.792 | 0.665-0.920 | <0.001 |
| HB | 0.787 | 0.656-0.917 | <0.001 |
| 25(OH)D3 + HB | 0.845 | 0.734-0.956 | <0.001 |

P for comparison between 25(OH)D3 and the combined model (DeLong test) = 0.135.
