# Supplementary material
Source: Research Square preprint supplement (doi:10.21203/rs.3.rs-9420352/v1)
Supplement: Supplementary file 2 [file ba7e1cec7471480f29c302c1.docx]

**Figure 1.**ROC curves for predictive performance of 25(OH)D3 for clinical activity

ROC, receiver operator characteristic curve

**Suppl Figure 1.** Spearman correlation analysis for correlations between 25(OH)D3 levels and disease activity

**Suppl Figure 2.** The RCS curve of the association serum 25(OH)D3 levels and the probability of disease clinical activity occurrence

RCS, restricted cubic spline
